# Supplementary material for: Vertical distribution of megafauna on the Bering Sea slope based on ROV survey
Source: PeerJ journal article supplement (doi:10.7717/peerj.8628), 2020-03-02

**Data S1:**

Images of megafauna identified during 75th cruise of the *RV Akademik M.A. Lavrentyev* on video.

**Porifera**

**Demospongiae**

*Cladorhiza corona*

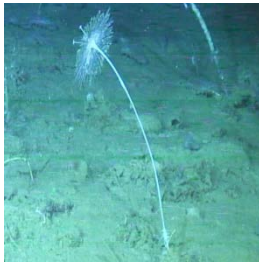

**Hexactinellida**

*Hyalonema* sp.

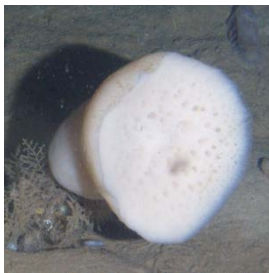

*Holascus* sp.

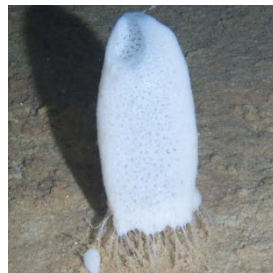

*Trachycaulus* sp. (stalk) *Caulophacus* sp.

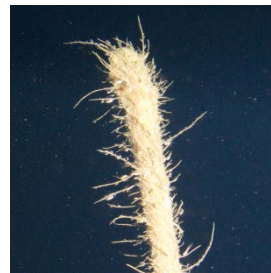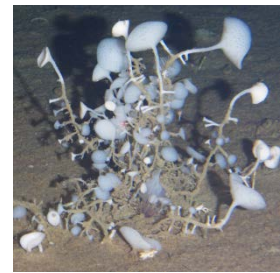

*Acanthascus (Acanthascus)* sp. *Acanthascus (Rhabdocalyptus)* sp. *Acanthascus (Staurocalyptus)* sp.

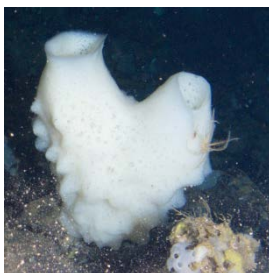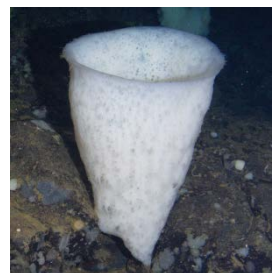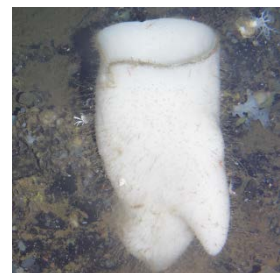

*Farrea* sp. 1

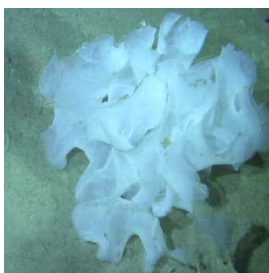

*Farrea* spp.

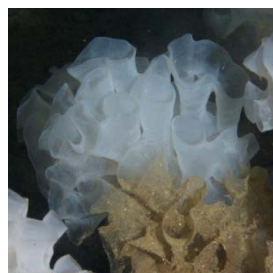

*Pinulasma fistulosum*

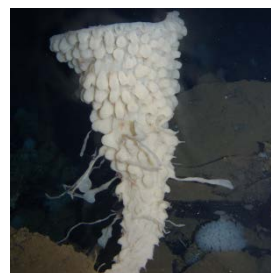

cf. *Heterochone*

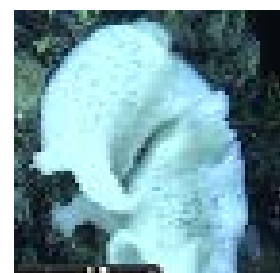

## Ctenophora

Ctenophora gen. sp. (benthic form)

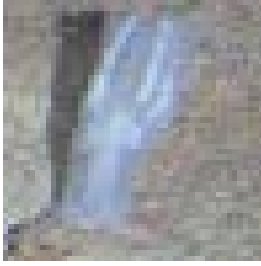

## Cnidaria

### Hydrozoa

*Stylaster* spp.

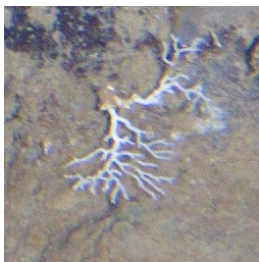

*Candelabrum* sp. *Branchiocerianthus imperator* Rhodaliidae gen. sp.

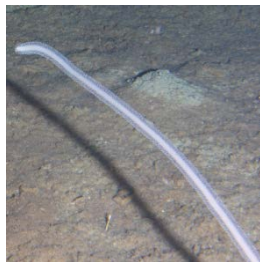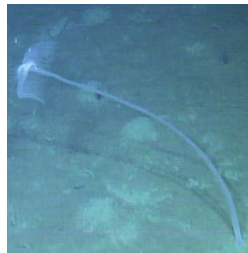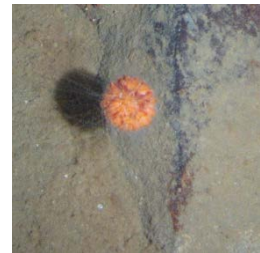

Rhopalonematidae gen. sp.

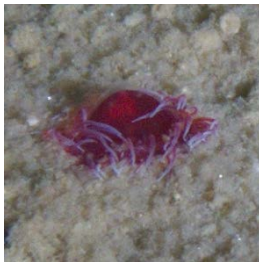

## Ceriantharia

Botrucnidiferidae gen. sp.

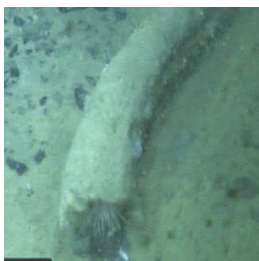

**Octocorallia**

**Alcyonacea**

*Radicipes* sp.

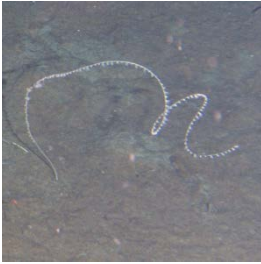

*Chrysogorgia* sp.

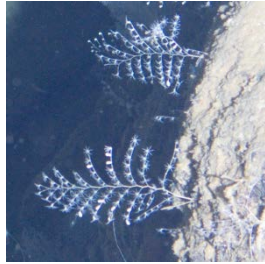

*Isidella* sp.

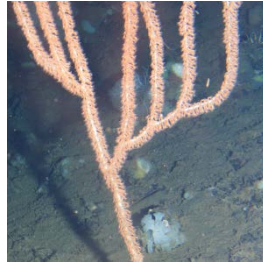

*Thouarella* sp.

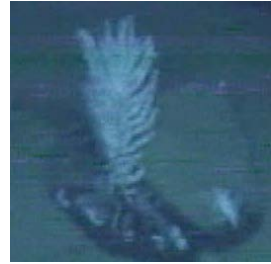

*Plumarella spicata*

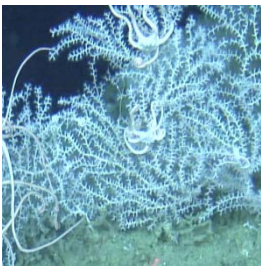

*Paragorgia* sp.1

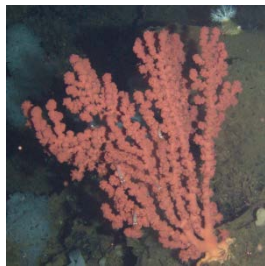

*Paragorgia* sp.2

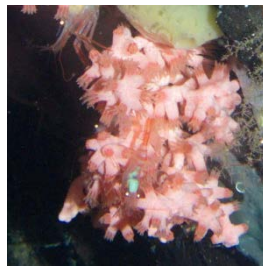

*Gersemia* sp.

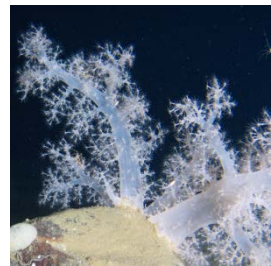

*Heteropolyus ritteri*

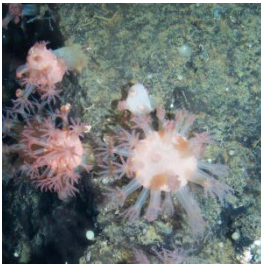

*Anthomastus* sp.

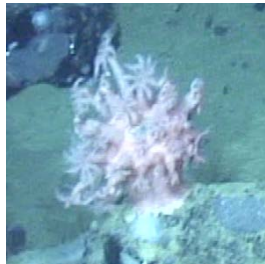

*Pseudoanthomastus* sp.

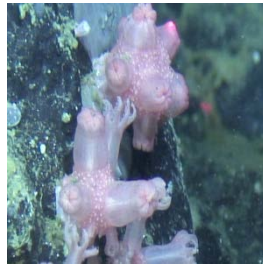

*Stolonifera* gen. sp.

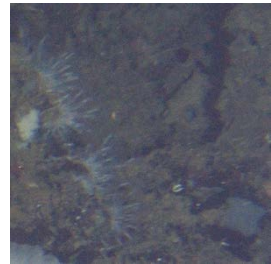

**Pennatulacea**

*Umbellula* sp.

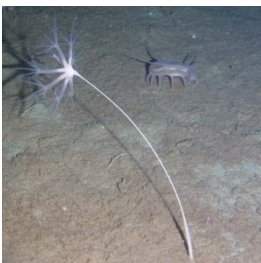

*Pennatula* sp.

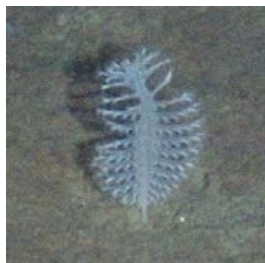

**Hexacorallia**

**Actiniaria**

*Actinernus robustus*

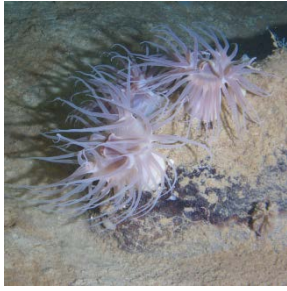

*Liponema brevicorne*

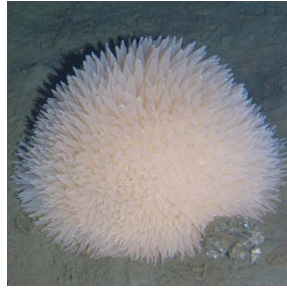

cf. *Halcampoides* sp.

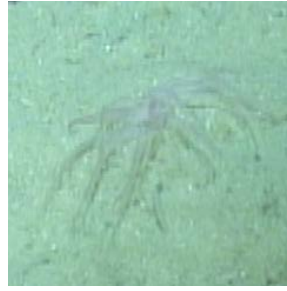

*Sicyonis* sp.1

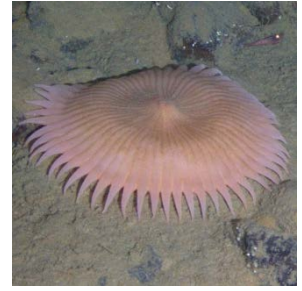

*Sicyonis* sp.2

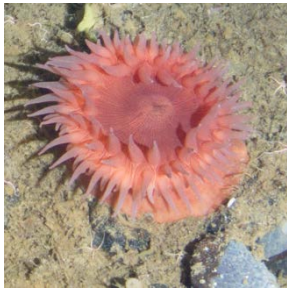

*Sicyonis* sp.3

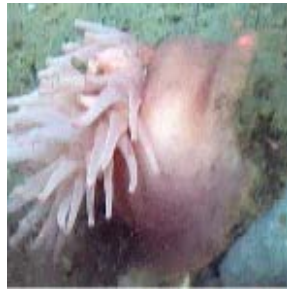

cf. *Actinostola faeculenta*

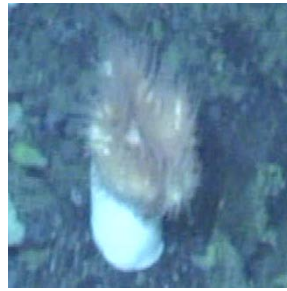

*Actinostola* sp.1

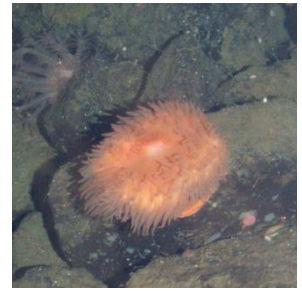

cf. *Actinostola* sp.2

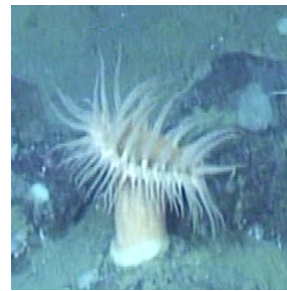

*Stomphia* sp.

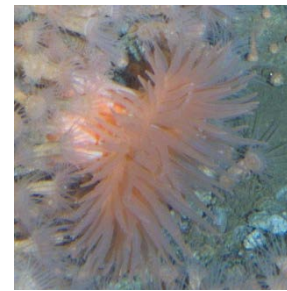

*Amphianthus* cf. *bathybium*

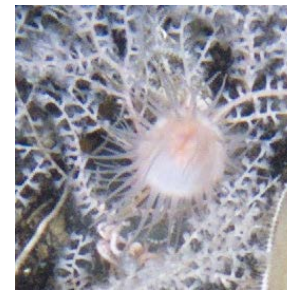

cf. *Amphianthus* sp.

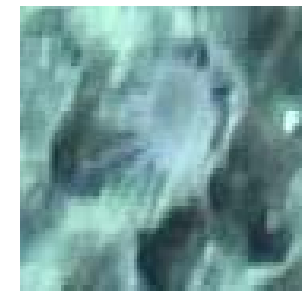

*Edwardsiella* sp.

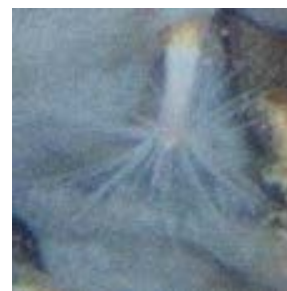

Edwardsiidae gen. sp.

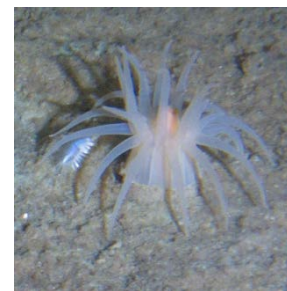

*Actinothoe* sp.

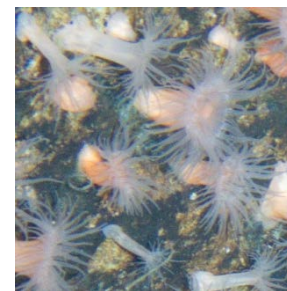

cf. *Hormathia* sp.

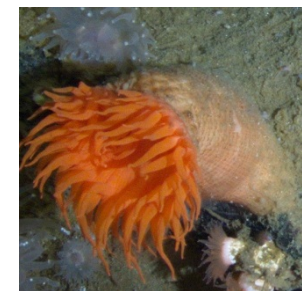

Hormathiidae gen. sp. 1

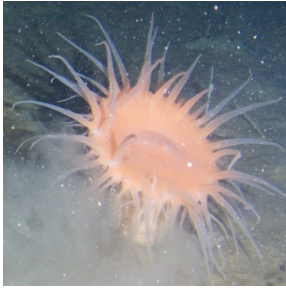

Hormathiidae gen. sp. 2 cf. Exocoelactinidae gen. sp. Actiniaria gen. sp. 1

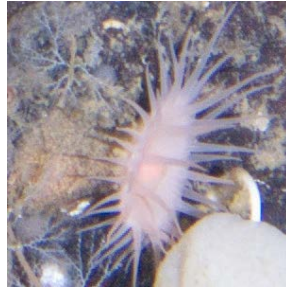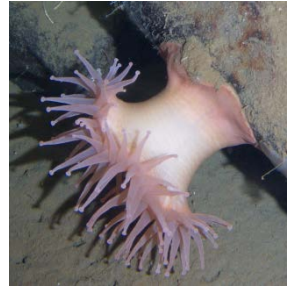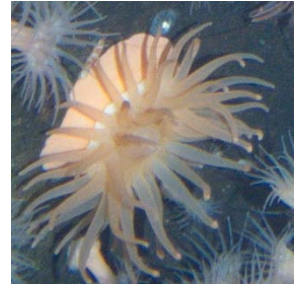

Actiniaria gen. sp. 2

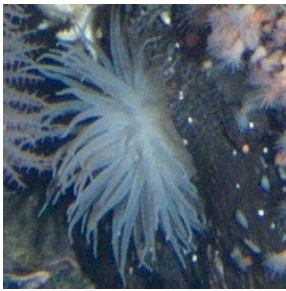

### Zoantharia

*Epizoanthus fatuus*

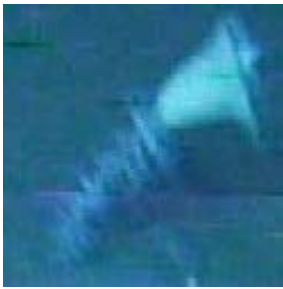

*Epizoanthus* sp.

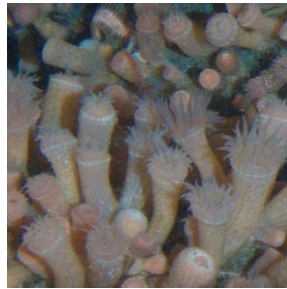

Zoantharia gen. sp.

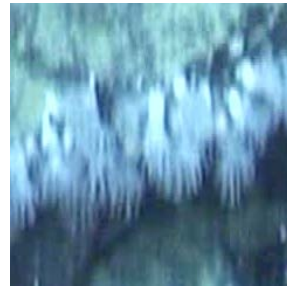

### Scleractinia

Caryophylliidae gen. sp. 1

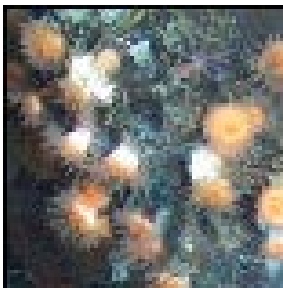

Caryophylliidae gen. sp. 2

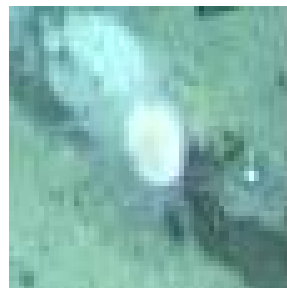

## Corallimorpharia

*Corallimorphus pilatus*

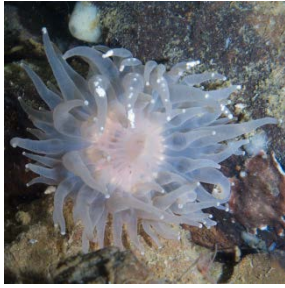

*Corallimorphus* sp.

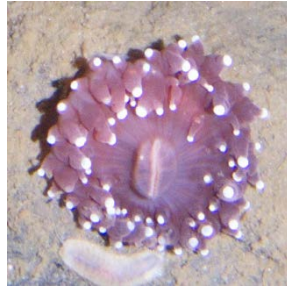

Corallimorphidae gen. sp

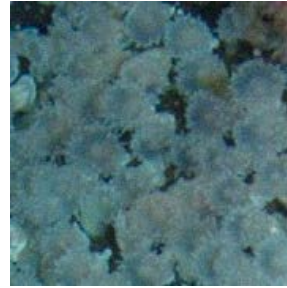

## Antipatharia

*Alternatipathes* sp.

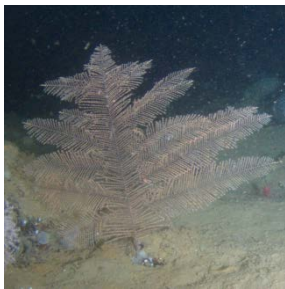

Antipatharia gen. sp.

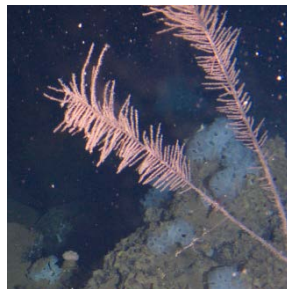

Schizopathidae gen. sp.

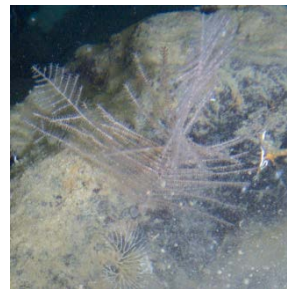

Antipatharia gen. sp.

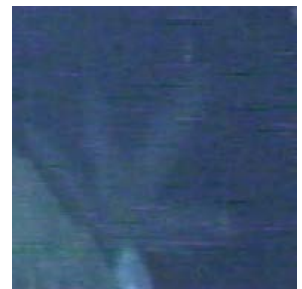

## Polychaeta

*Echiura* gen. sp.

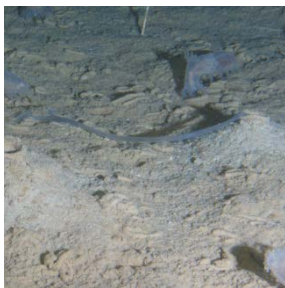

## Mollusca

### Polyplacophora

Polyplacophora gen. sp.1

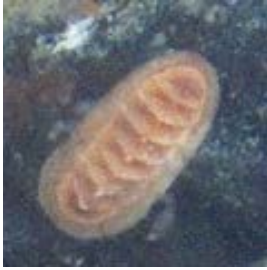

Polyplacophora gen. sp.2

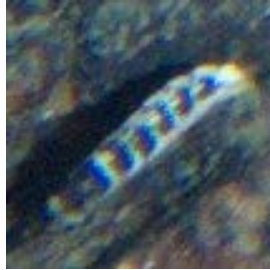

Polyplacophora gen. sp.3

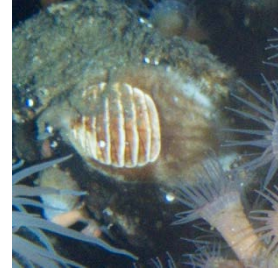

### Gastropoda

Gastropoda gen. sp.1

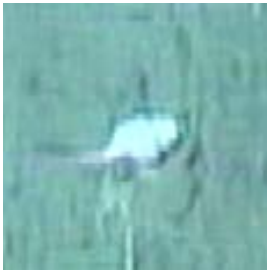

Gastropoda gen. sp.2

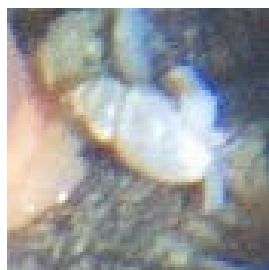

Gastropoda gen. sp.3

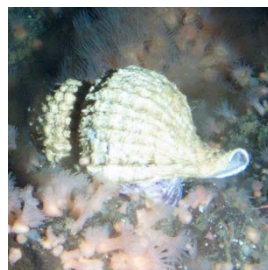

*Tritonia* cf. *diomedea*

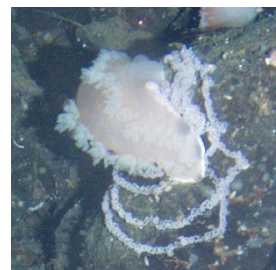

### Cephalopoda

*Mussoctopus profundorum*

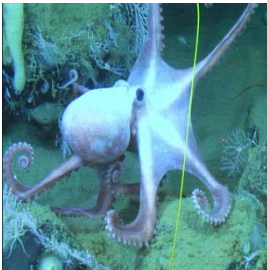

Cephalopoda gen. sp.2

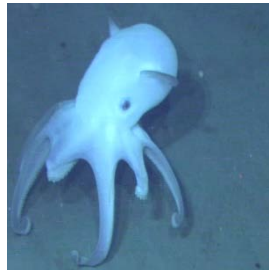

## Arthropoda

### Hexanauplia

Scalpellidae gen. sp.

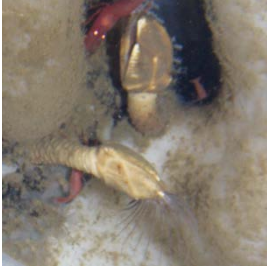

### Malacostraca

Munidopsis gen. spp.

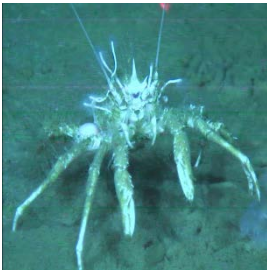

Galatheidae gen. spp.

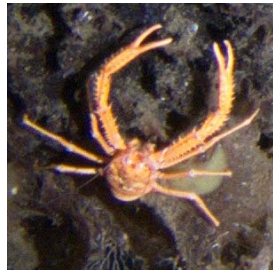

Lithodidae gen. spp.

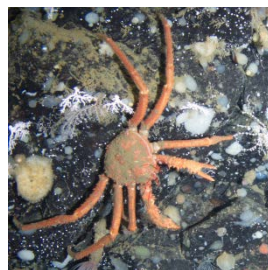

*Chionoecetes* sp.

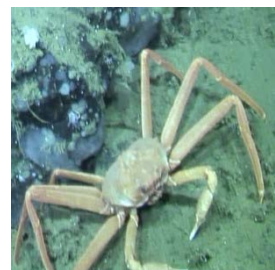

Oregoniidae gen. sp.

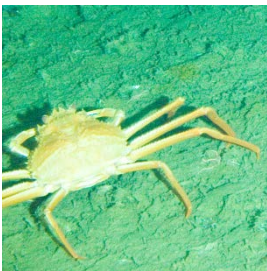

Crangonidae gen. sp.

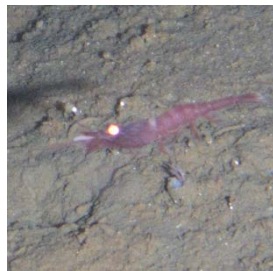

### Pycnogonida

cf. *Colossendeis* sp.

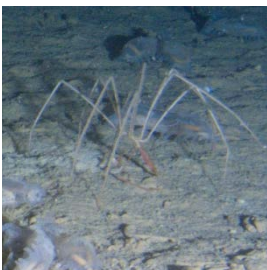



# Echinodermata

## Holothuroidea

*Kolga kamchatica*

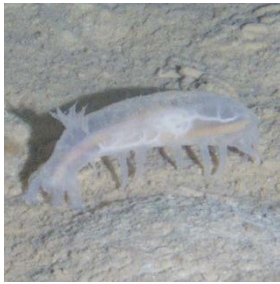

*Scotoplanes kurilensis*

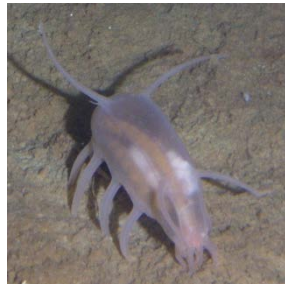

*Zygothuria* sp.1

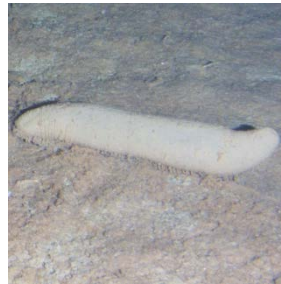

? *Zygothuria* sp.2

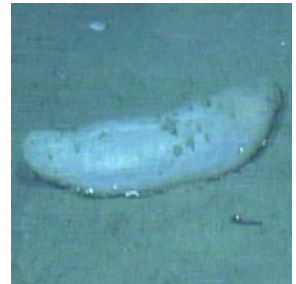

*Psychropotes "raripes"*

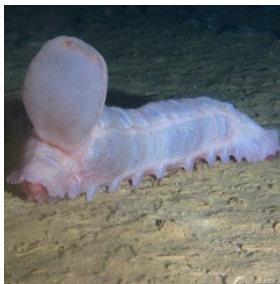

*Psychropotes* aff. *longicauda*

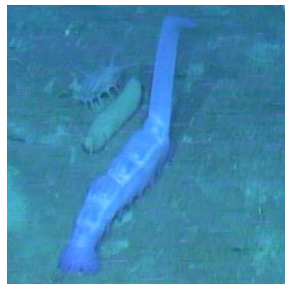

*Paelopatides solea*

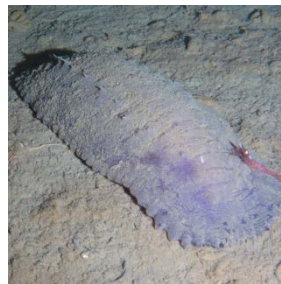

? *Paelopatides* sp.

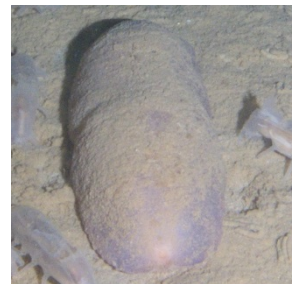

*Synallactes chuni*

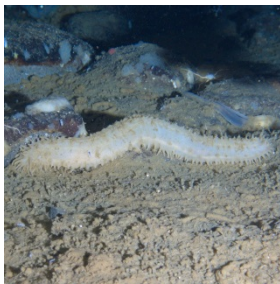

*Synallactes* sp. 1

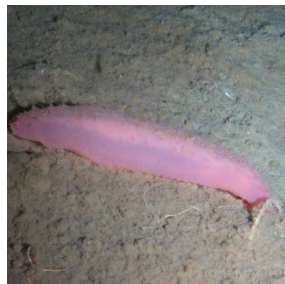

*Synallactes* sp. 2

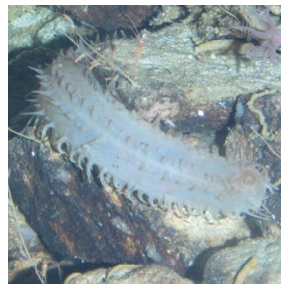

Synallactidae gen.sp.1

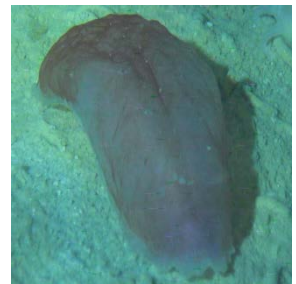

Synallactidae gen sp.2

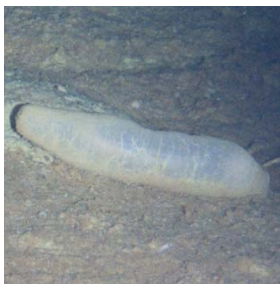

*Pannychia* aff. *moseleyi*

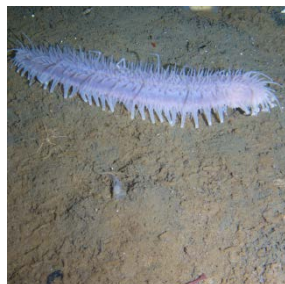

*Psolus* sp.

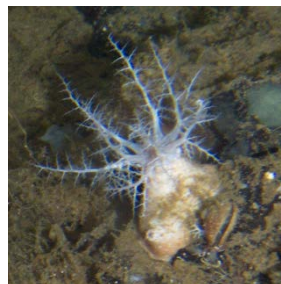

*Abyssocucumis* cf. *abyssorum*

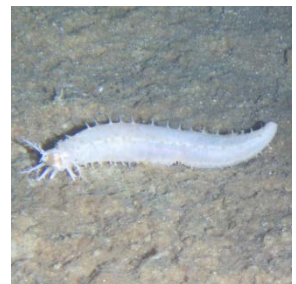

?Holothuroidea gen. sp.

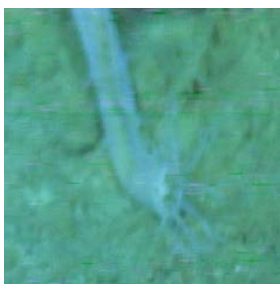

**Ophiuroidea**

*Ophiacantha bathybia*

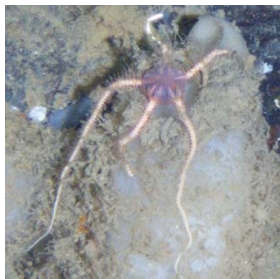

*Ophiacantha cf. enneactis*

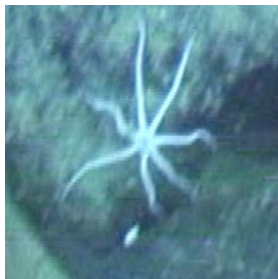

*Ophiophthalmus* sp.

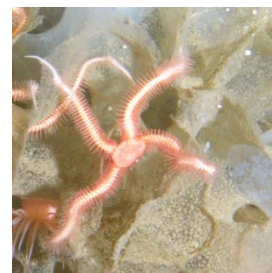

*Ophiura bathybia*

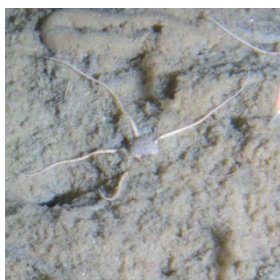

*Ophiura* sp.1

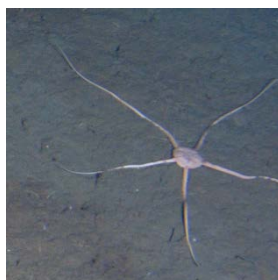

*Ophiura* sp.2

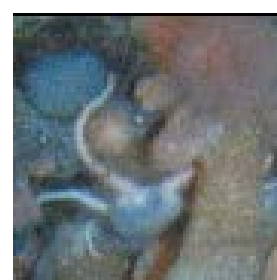

*Astrochele laevis*

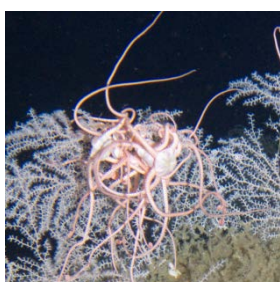

*Ophiopholis cf. japonica*

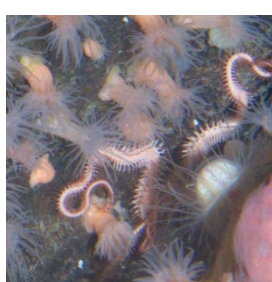

**Asteroidea**

*Astrocles actinodetus* *Freyella kurilokamchatica* Freyellidae gen. sp. *Hymenodiscus beringiana*

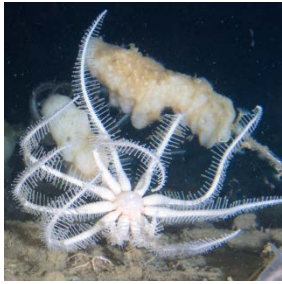

Brisingidae gen. sp.1

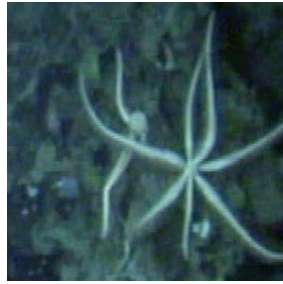

Brisingidae gen. sp.2

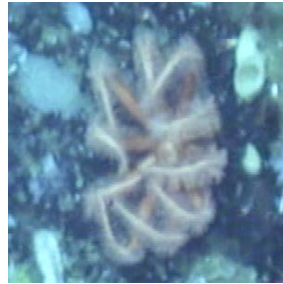

Brisingidae gen. sp. 3

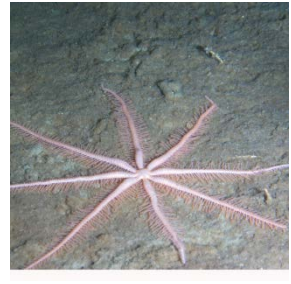

*Hymenaster* sp.

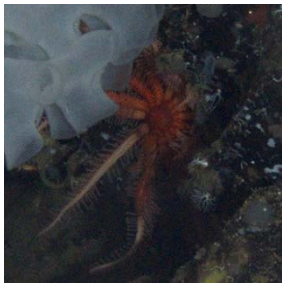

*Pteraster* sp. 1

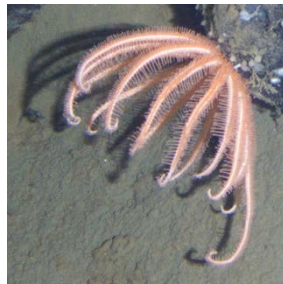

*Pteraster* sp. 2

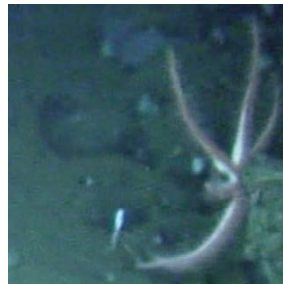

*Crossaster papposus*

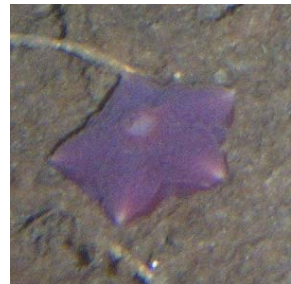

*Crossaster* sp.

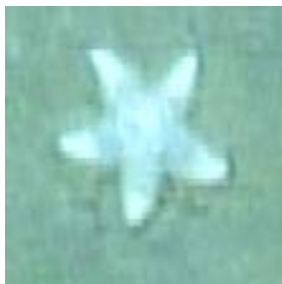

*Lophaster* sp.

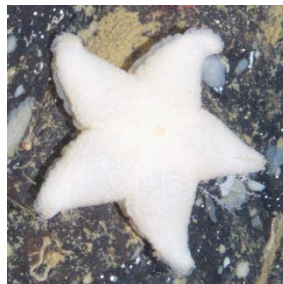

*Solaster* sp.

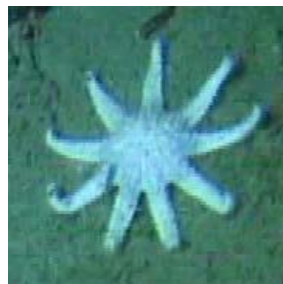

*Nearchaster* sp.

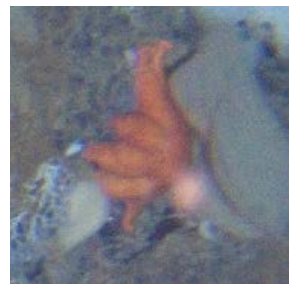

*Hydrasterias* sp.

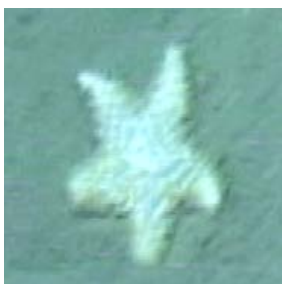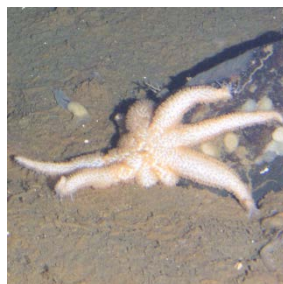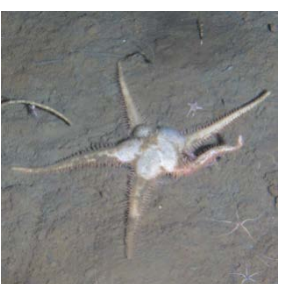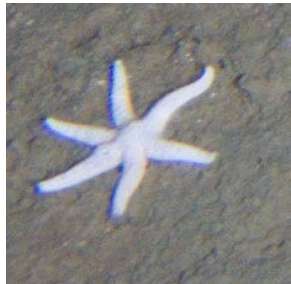

*Hippasteria* sp.

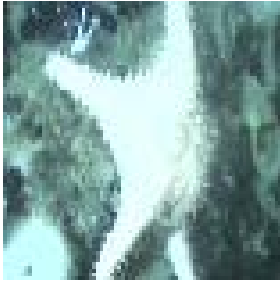

Goniasteridae gen.sp.1 Goniasteridae gen.sp.2 Goniasteridae gen.sp.3

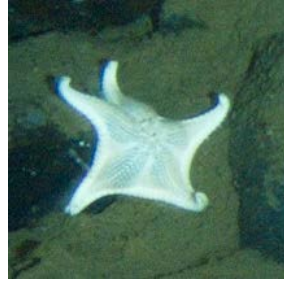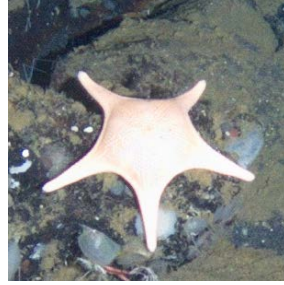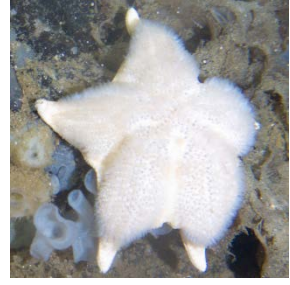

*Henricia* spp.

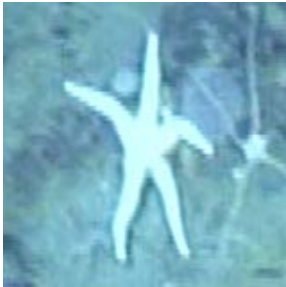

## Hemichordata

### Enteropneusta

Enteropneusta gen. sp.1

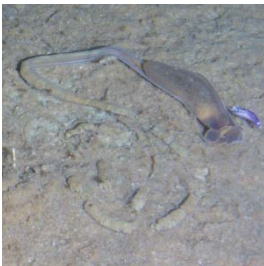

Torquaratoridae gen. sp.

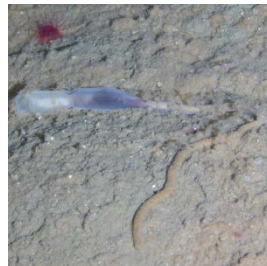

## Chordata

### Asciacea

*Corynascidia* sp.

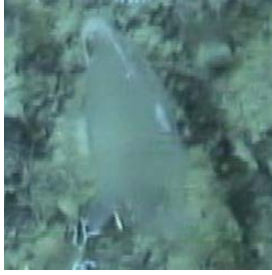

*Ciona pomponiae*

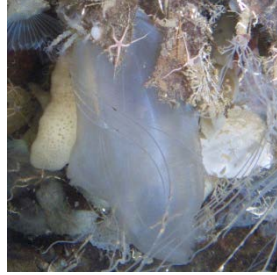

cf. *Bathypera ovoida*

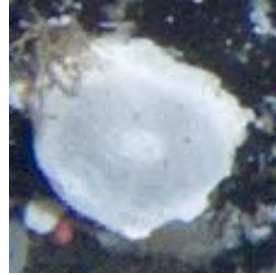

*Boltenia echinata*

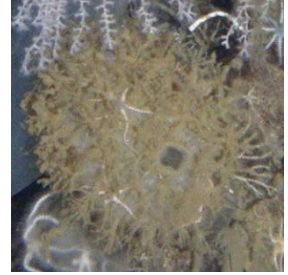

*Megalodicopia hians*

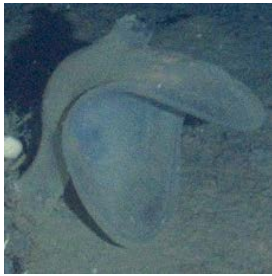

*Cnemidocarpa ochotense*

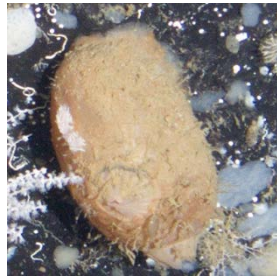

cf. *Styelidae* gen. sp.

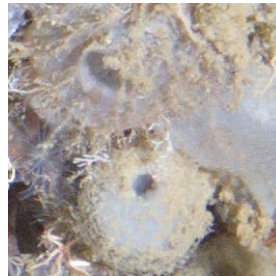

*Aplousobranchia* gen. sp.

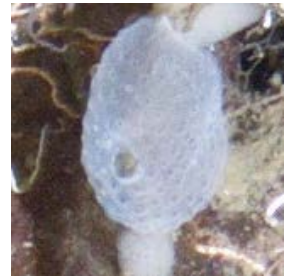

Supplement: Supplemental_Data_S1.pdf [file Supplemental_Data_S1.pdf]
