# Supplementary material for: Vertical distribution of megafauna on the Bering Sea slope based on ROV survey
Source: PeerJ. 2020 Mar 2;8:e8628. doi: 10.7717/peerj.8628 (PMC7058103; doi:10.7717/peerj.8628)
Supplement: Table S1 — Taxa identified based on collected material are marked by *. Abundance of all identified species on hard and soft substrate was evaluated visually based on a four-point: 4 - dominant species, 3 - abundant species, 2 - common species, 1 - rare species. [file peerj-08-8628-s002.xlsx]

## Sheet: Table 1
Table S1. Complete list of taxa identified on video and in collected material during 75th cruise of the RV Akademik M.A. Lavrentyev
Taxa identified based on collected material are marked by *.
Abundance of all identified species on hard and soft substrate was evaluated visually based on a four-point: 4 - dominant species, 3 - abundant species, 2 - common species, 1 - rare species.
			Dive	LV75-16	LV75-22	LV75-21								LV75-17						LV75-18					LV75-1	LV75-9
			Depth range	4277-4278	3610 – 3450	3030-2910		2910-2790		2790-2650		2650-2470		2470-2290		2290-2130		2130-1830		1830-1750		1750-1370		1370-720			720-440	440-390	390-350
			Dominant species on soft and/or hard substrate	Kolga kamchatica	Scotoplanes kurilensis	Ophiura bathybia, Scotoplanes kurilensis		Scotoplanes kurilensis, Ophiura bathybia, Crangonidae gen. sp.		Crangonidae gen. sp.		Paelopatides solea, Crangonidae gen. sp.		Paelopatides solea, Crangonidae gen. sp., Rhopalonematidae gen. sp.		Rhopalonematidae gen. sp., Torquaratoridae gen. sp.		Torquaratoridae gen. sp.		Synallactes chuni, Ophiura spp., Ophiocantha spp.,		Ophiura spp., Ophiocantha spp., Synallactes chuni, Farrea spp.		Farrea spp., Ophiura spp., Ophiocantha spp.			Heteropolypus ritteri	Heteropolypus ritteri, Corallimorphus pilatus	Epizoanthus sp.
			Substrate	Soft	Soft	Hard	Soft	Hard	Soft	Hard	Soft	Hard	Soft	Hard	Soft	Hard	Soft	Hard	Soft	Hard	Soft	Hard	Soft	Hard	Hard	Hard	Hard	Hard	Hard
Phylum	Class	Family	Species
Porifera	Demospongiae	Fam. varia indet.	Demospongiae varia indet.	2	2	2		2		2		2		2		2		2		2		2		2	2	2	2	2	2
		Cladorhizidae	Cladorhiza corona	1*
Porifera	Hexactinellida	Hyalonematidae	Hyalonema sp.	2*	2
		Euplectellidae	Holascus sp.		3*
		Euplectellidae	Trachycaulus sp. (stalk)																	1*
		Rossellidae	Caulophacus sp.		2*
		Rossellidae	Acanthascus (Acanthascus) sp.																			*				*
		Rossellidae	Acanthascus (Rhabdocalyptus) sp.	*				*								*						*				*
		Rossellidae	Acanthascus (Staurocalyptus) sp.																							*
		Rossellidae	Rossellidae gen. spp.		2			2		2						2						2		2	2	2	2	1
		Rossellidae	Bathydorus sp.																							*
		Farreidae	Farrea sp.n. 1		2*
		Farreidae	Farrea sp.n. 2		2*
		Farreidae	Farrea kurilensis																							*
		Farreidae	Farrea aspondyla																						*
		Farreidae	Farrea spp.															2		2		3		4	4	4	2
		Euretidae	Pinulasma fistulosum		1																	2				2	2		2
		Euretidae	cf. Pararete sp.																			*
		Aphrocallistidae	cf. Heterochone																					2*	2*	2
Ctenophora	Class indet.	Fam. indet.	Ctenophora gen. sp. (benthic form)	1	1
Cnidaria	Hydrozoa	Stylasteridae	Stylaster spp.		2	2		2						2		2				2		2		2	2	2
		Candelabridae	Candelabrum sp.	1	1
		Corymorphidae	Branchiocerianthus imperator		1
		Rhodaliidae	Rhodaliidae gen. sp.															1				1
		Rhopalonematidae	Rhopalonematidae gen. sp.										2		4		4		2
	Anthozoa	Botrucnidiferidae	Botrucnidiferidae gen. sp.																			1*
		Ceriantharia fam. varia. indet.	Ceriantharia varia indet.		3		3		2		2		2	2	2		2		2		2	2
		Chrysogorgiidae	Radicipes sp.		1					1
		Chrysogorgiidae	Chrysogorgia sp.							2
		Isididae	Isidella sp.																					2		2
		Isididae	Isididae gen spp.		2			1				2		2		2				2		2
		Primnoidae	Thouarella sp.					2
		Primnoidae	Plumarella spicata									2*
		Primnoidae	Primnoidae gen spp.		2			2		2		2		2				2		2		2				1	2
		Paragorgiidae	Paragorgia sp.1																			2		2		2
		Paragorgiidae	Paragorgia sp.2																							1	1
		Nephtheidae	Gersemia sp.					1*
		Alcyoniidae	Heteropolypus ritteri																					2*		2	4	4	2
		Alcyoniidae	Anthomastus sp.															2		2		2
		Alcyoniidae	Pseudoanthomastus sp.											2								2*
		Fam. indet.	Stolonifera gen. sp.																							1
		Umbellulidae	Umbellula sp.		3*				2
		Pennatulidae	Pennatula sp.		3*
		Actinernidae	Actinernus robustus		1*
		Liponematidae	Liponema brevicorne						1
		Halcampoididae	cf. Halcampoides sp.										2		2		2
		Actinostolidae	Sicyonis sp.n.1					1		1*	1
		Actinostolidae	Sicyonis sp.n.2									1				1		1						1	2	2*	1
		Actinostolidae	Sicyonis sp.n.3													1*										1
		Actinostolidae	Sicyonis spp.					1								1
		Actinostolidae	cf. Actinostola faeculenta																					1
		Actinostolidae	Actinostola sp.1																									1	2
		Actinostolidae	cf. Actinostola sp.2															1
		Actinostolidae	Stomphia sp.																										2
		Actinostolidae	Actinostolidae gen. spp.							1		1		1				1						2
		Hormathiidae	Amphianthus cf. bathybium									1*
		Hormathiidae	cf. Amphianthus sp.													1						1
		Edwardsiidae	Edwardsiella sp.					1		1
		Edwardsiidae	Edwardsiidae gen. sp.		2		1										2		2
		Sagartiidae	Actinothoe sp.																										3
		Hormathiidae	cf. Hormathia sp.																										2
		Hormathiidae	Hormathiidae gen. sp. 1		1													1
		Hormathiidae	Hormathiidae gen. sp. 2																			1
		Hormathiidae	Hormathiidae gen. spp.																			1		2
		Exocoelactinidae	cf. Exocoelactinidae gen. sp.					1						1
		Family indet.	Actiniaria gen. sp. 1																										2
		Family indet.	Actiniaria gen. sp. 2																										2
		Family indet.	Actiniaria gen. spp.									1										2		2	2	2
		Epizoanthidae	Epizoanthus fatuus	1	1
		Epizoanthidae	Epizoanthus sp.																										4
		Family indet.	Zoantharia gen. sp.											1		1
		Caryophylliidae	Caryophylliidae gen. sp. 1																									2	3
		Caryophylliidae	Caryophylliidae gen. sp. 2											1								1
		Corallimorphidae	Corallimorphus pilatus		1																							4	2
		Corallimorphidae	Corallimorphus sp.					1							1
		Corallimorphidae	Corallimorphidae gen. sp.n.																									3	2*
		Schizopathidae	Schizopathidae gen. sp.									1
		Schizopathidae	Alternatipathes sp.											1*
		Antipatharia fam. indet.	Antipatharia gen. sp.																							1
Annelida	Polychaeta	Echiura fam. indet.	Echiura gen. sp.	2	2		2		1		1		1		1
Mollusca	Polyplacophora	Fam. indet.	Polyplacophora gen. sp.1							1																1		2	2
		Fam. indet.	Polyplacophora gen. sp.2																									2	2
		Fam. indet.	Polyplacophora gen. sp.3																										2
	Gastropoda	Fam. indet.	Gastropoda gen. sp. 1				2		2		2		2					2	2	2		2				2
		Fam. indet.	Gastropoda gen. sp. 2																										1
		Fam. indet.	Gastropoda gen. sp. 3																										1
		Tritoniidae	Tritonia cf. diomedea																								2	2
	Cephalopoda	Enteroctopodidae	Muusoctopus profundorum							1		1	1		1	1		1	1			1
		Fam. indet.	Cephalopoda gen. sp.2										1		1
Arthropoda	Hexanauplia	Scalpellidae	Scalpellidae gen. sp.							2
	Malacostraca	Munidopsidae	Munidopsis spp.	2	2					2				2		2		2		2		2		3	3	3
		Galatheidae	Galatheidae gen. spp.																			2		3	3	3	3
		Lithodidae	Lithodidae gen. spp.					2		2		2	2	2	2	2	2	2	1	2		2		2	2	2	2	2	2
		Oregoniidae	Chionoecetes sp.												1				2		2			2
		Oregoniidae	Oregoniidae gen. sp.																						1
		Crangonidae	Crangonidae gen. sp.	2	2		2		3		4		4		4		3		2
	Pycnogonida	Colossendeidae	cf. Colossendeis sp.	1			1		1
		Fam. indet.	Pycnogonida gen. spp.		1			1
Brachiopoda	Rhynchonellata	Cancellothyridinae	Terebratulina cf. kiiensis																									3*	2*
		Laqueidae	Laqueus sp.																									2	2
		Fam. indet.	Brachiopoda gen. spp.			2								2		2		2		2		2		1
Echinodermata	Crinoidea	Hyocrinidae	Ptilocrinus cf. ahearnae					*
		Hyocrinidae	Ptilocrinus (Ptilocrinus) pinnatus									*
		Hyocrinidae	Camaecrinus klikushini			*
			Crinoidea stalked gen. spp.		2	2	2	2		2		2
		cf. Septocrinidae	cf. Septocrinidae gen. sp.	*
			Crinoidea unstalked gen. spp.	2	2		2	1		1		2		2		1		2		2	1	1		1	1	1
	Holothuroidea	Elpidiidae	Kolga kamchatica	4*	2				1
		Elpidiidae	Scotoplanes kurilensis	2	4		4*		4
		Mesothuriidae	Zygothuria sp.n.1	3*	3		2
		Mesothuriidae	? Zygothuria sp.2								1
		Psychropotidae	Psychropotes "raripes"	2*
		Psychropotidae	Psychropotes aff. longicauda		2
		Synallactidae	Paelopatides solea		2		2		3		2		4		4*		3		2
		Synallactidae	? Paelopatides sp.	1	1
		Synallactidae	Bathyplotes sp.											*
		Synallactidae	Synallactes chuni															3*	3	4	4	4	4	1
		Synallactidae	Synallactes sp. 1		1		1
		Synallactidae	Synallactes sp. 2																										1
		Synallactidae	Synallactidae gen.sp.1	1
		Synallactidae	Synallactidae gen sp.2		1
		Laetmogonidae	Pannychia aff. moseleyi												2	2	2		3*				2
		Psolidae	Psolus spp.																					3	3	3	3
		Cucumariidae	Abyssocucumis cf. abyssorum	2	3*
		Family indet.	?Holothuroidea gen. sp.	1
	Ophiuroidea	Ophiacanthidae	Ophiacantha bathybia	*	2*
			Ophiacantha cf. enneactis							2*								2
			Ophiophthalmus sp.																			2*		2	2	2
			Ophiacantha sp.1	2*
			Ophiacantha spp.					2		2	2	2		2		2	2	2	2	3	4	3	4	4	2	2
		Ophiuridae	Ophiura bathybia				4		4*		2
			Ophiura sp.1				1
			Ophiura sp.2																										1
			Ophiura leptoctenia																						*
			Ophiura spp.							2		2		2		2	2	2	2	3	4	3	4	4
		Gorgonocephalidae	Astrochele laevis									2*
		Ophiopholidae	Ophiopholis cf. japonica																										2
	Asteroidea	Freyellidae	Astrocles actinodetus	2*	2*
		Freyellidae	Freyella kurilokamchatica																			1		1
		Freyellidae	Freyellidae gen. sp.																					1
		Brisingidae	Hymenodiscus beringiana		1*		1
		Brisingidae	Novodinia sp.																							1*
		Brisingidae	Brisingidae gen. sp.1																							1
		Brisingidae	Brisingidae gen. sp.2			1
		Brisingidae	Brisingidae gen. sp. 3															1				1
		Pterasteridae	Hymenaster sp.		2
		Pterasteridae	Pteraster sp. 1					1								1
		Pterasteridae	Pteraster sp. 2											2						2		2							2
		Solasteridae	Crossaster papposus			1*		2		2																			2
		Solasteridae	Crossaster sp.		1
		Solasteridae	Lophaster sp.							1				1
		Solasteridae	Solaster sp.															2	2									2
		Benthopectinidae	Nearchaster sp.				2*		1		1
		Pedicellasteridae	Hydrasterias sp.					2	2	2	2	2	2									2
		Goniasteridae	Hippasteria sp.																							1
		Goniasteridae	Goniasteridae gen.sp.1															2	2				1
		Goniasteridae	Goniasteridae gen.sp.2																	2		2		2	2		2	2	2
		Goniasteridae	Goniasteridae gen.sp.3																					2	2	2			2
		Echinasteridae	Henricia sp. 1 и sp. 2																				1	1*	1	1*			1
		Family indet. (Echinasteridae or Asteriidae)	Asteroidea gen.spp.		2	2	2	2			2	2		2		2	2	2	2	2		2	2		2	2	2
Hemichordata	Enteropneusta	Torquaratoridae	Torquaratoridae gen. sp.											2	2	4	4	4	4		2		2
		Family indet.	Enteropneusta gen. sp.1	2	2
Chordata	Ascidiacea	Corellidae	Corynascidia sp.		2
		Cionidae	Ciona pomponiae					2				2		2										1
		Pyuridae	cf. Bathypera ovoida			1	1											2				2
		Pyuridae	Boltenia echinata											2								2
		Octacnemidae	Megalodicopia hians					2*										2				2		2
		Styelidae	Cnemidocarpa ochotense																			1				2
		cf. Styelidae	cf. Styelidae gen. sp.					2		2		2		2		2		2				2		2	2
		Family indet.	Aplousobranchia gen. sp.			2		2				2										2				2
